# Supplementary material for: Design principles for Bernal spirals and helices with tunable pitch
Source: Royal Society of Chemistry journal article supplement (doi:10.1039/c4nr00324a), 2014-01-01
Supplement: c4nr00324a1.pdf [file c4nr00324a1.pdf]

## Supplementary information for the manuscript ‘Design principles for helices with tunable pitch and Bernal spirals’

Szilard N. Fejer<sup>a,b,\*</sup>, Dwaipayan Chakrabarti<sup>c,†</sup>

Halim Kusumaatmaja<sup>d,‡</sup> and David J. Wales<sup>e,§</sup>

<sup>a</sup> *Department of Chemical Informatics,  
University of Szeged, Faculty of Education,  
Boldogasszony sgt. 6, H-6725 Szeged, Hungary*

<sup>b</sup> *Pro-Vitam Ltd., str. Muncitorilor nr. 16, 520032 Sfantu Gheorghe, Romania*

<sup>c</sup> *School of Chemistry, University of Birmingham,  
Edgbaston, Birmingham B15 2TT, United Kingdom*

<sup>d</sup> *Department of Physics, Durham University,  
South Road, Durham DH1 3LE, United Kingdom*

<sup>e</sup> *University Chemical Laboratories, Lensfield Road,  
Cambridge CB2 1EW, United Kingdom*

---

\*Electronic address: [szilard.fejer@cantab.net](mailto:szilard.fejer@cantab.net)

†Electronic address: [d.chakrabarti@bham.ac.uk](mailto:d.chakrabarti@bham.ac.uk)

‡Electronic address: [halim.kusumaatmaja@durham.ac.uk](mailto:halim.kusumaatmaja@durham.ac.uk)

§Electronic address: [dw34@cam.ac.uk](mailto:dw34@cam.ac.uk)

## **I. SUPPLEMENTARY MOVIE 1 LEGEND**

This movie shows the fastest rearrangement mechanism between a 20 particle Bernal spiral and a symmetrical cyclic structure, which is a kinetic trap on the energy landscape for 20 particles. The first four rearrangements along the pathway are low-energy ‘hinge’ motions.

## **II. SUPPLEMENTARY MOVIE 2 LEGEND**

This movie shows the fastest pathway for inverting the chirality of a left-handed  $N = 24$  helical structure. The rearrangement proceeds exclusively through low-energy ‘hinge’ motions.

## **III. SUPPLEMENTARY MOVIE 3 LEGEND**

This movie shows the transformation of a 24-particle spiral into a highly symmetric ‘donut’-structure, which is the global minimum for this number of particles. The second rearrangement along the pathway has a high energy barrier, and corresponds to a change in dimerization pattern between the four particles at the lower end of the helix. All other motions are low-energy ‘hinge’ rearrangements.
